# Supplementary material
Source: PubMed Central journal article supplement (PMC5014195)
Supplement: AGE-46-711-s001.pdf [file AGE-46-711-s001.pdf]

**Table S1.** COLQ c.1190G>A genotypes in domestic cat breeds

| Type*           | Population           | Lab | No.        | Wildtype<br>(CC) | Carrier<br>(CT) | Affected<br>(TT) |
|-----------------|----------------------|-----|------------|------------------|-----------------|------------------|
| <b>Unbiased</b> | Abyssinian           | MU  | 8          | 8                | 0               | 0                |
|                 | American Shorthair   | MU  | 8          | 8                | 0               | 0                |
|                 | Bengal               | MU  | 7          | 7                | 0               | 0                |
|                 | Birman               | MU  | 7          | 7                | 0               | 0                |
|                 | British              | MU  | 6          | 6                | 0               | 0                |
|                 | Burmese              | MU  | 4          | 4                | 0               | 0                |
|                 | Cornish Rex          | MU  | 8          | 8                | 0               | 0                |
|                 | Chartreux            | MU  | 6          | 6                | 0               | 0                |
|                 | Devon Rex            | MU  | 88         | 82               | 6               | 0                |
|                 | Egyptian Mau         | MU  | 7          | 7                | 0               | 0                |
|                 | Japanese Bobtail     | MU  | 7          | 7                | 0               | 0                |
|                 | Khao Manee           | MU  | 1          | 1                | 0               | 0                |
|                 | Korat                | MU  | 7          | 7                | 0               | 0                |
|                 | Maine Coon           | MU  | 8          | 8                | 0               | 0                |
|                 | Manx                 | MU  | 5          | 5                | 0               | 0                |
|                 | Norwegian Forest Cat | MU  | 7          | 7                | 0               | 0                |
|                 | Ocicat               | MU  | 7          | 7                | 0               | 0                |
|                 | Oriental             | MU  | 5          | 5                | 0               | 0                |
|                 | Persian              | MU  | 7          | 7                | 0               | 0                |
|                 | Ragdoll              | MU  | 5          | 5                | 0               | 0                |
|                 | Russian Blue         | MU  | 5          | 5                | 0               | 0                |
|                 | Siamese              | MU  | 6          | 6                | 0               | 0                |
|                 | Siberian             | MU  | 7          | 7                | 0               | 0                |
|                 | Sphynx               | MU  | 98         | 98               | 0               | 0                |
|                 | Tonkinese            | MU  | 6          | 6                | 0               | 0                |
|                 | Turkish Angora       | MU  | 6          | 6                | 0               | 0                |
|                 | Turkish Van          | MU  | 2          | 2                | 0               | 0                |
|                 | Random Bred          | MU  | 16         | 16               | 0               | 0                |
| Sub-total       | 28 Breeds            | MU  | 354        | 348              | 6               | 0                |
|                 | Devon Rex            | UM  | 20         | 20               | 0               | 0                |
|                 | Sphynx               | UM  | 20         | 20               | 0               | 0                |
| Sub-total       | 2 Breeds             | UM  | 40         | 40               | 0               | 0                |
|                 | Devon Rex            | VGL | 94         | 92               | 2               | 0                |
|                 | Sphynx               | VGL | 99         | 98               | 1               | 0                |
| Subtotal        | 2 Breeds             | VGL | 193        | 190              | 3               | 0                |
| <b>Biased</b>   | Devon Rex            | MU  | 39         | 17               | 5               | 17               |
|                 | Sphynx               | MU  | 1          | 0                | 0               | 1                |
| <b>Totals</b>   | 28 breeds            |     | <b>627</b> | <b>595</b>       | <b>14</b>       | <b>18</b>        |

\*Type implies if the cat samples were ‘biased’ because they were collected as part of the disease study versus ‘unbiased’ because the laboratory conducted a population screen of samples submitted for other genetic testing. Biased affected cats include the cats from all three publications (Malik *et al.* 1993; Shelton *et al.* 2007; Martin *et al.* 2008). Four of five sampled cats from Malik *et al.* (1992) were successfully genotyped from formalin-fixed paraffin-embedded muscle samples. MU – Lyons laboratory, University of Missouri; VGL – Veterinary Genetics Laboratory, UC Davis; UM implies samples tested at the University of Milan.
