# Supplementary material
Source: PubMed Central journal article supplement (PMC5014195)
Supplement: AGE-46-711-s002.pdf [file AGE-46-711-s002.pdf]

**Table S2.** WGS variants identified in 20x coverage of an affected Devon Rex.

| Variant  |                         | Analysis performed to prioritize variants** |             |                |
|----------|-------------------------|---------------------------------------------|-------------|----------------|
| Impact*  | Functional Class        | WGS Cat                                     | Segregation | GWAS haplotype |
|          |                         | High                                        | Stop gain   | 296            |
|          | Start / Stop loss       | 56                                          | 4           | -              |
|          | Splice donor / acceptor | 1,350                                       | 43          | -              |
|          | Exon deletion           | 2                                           | -           | -              |
|          | Frameshift              | 3,013                                       | 69          | -              |
|          | Rare amino acid         | -                                           | -           | -              |
| Moderate | Codon alteration        | 577                                         | 35          | -              |
|          | Missense                | 22,905                                      | 820         | 5              |
|          | Splice branch           | -                                           | -           | -              |
|          | 5' or 3' UTR Deletion   | -                                           | -           | -              |
| Low      |                         | 41,926                                      | 1,301       | 8              |
| Modifier |                         | 11,646,620                                  | 535,250     | 1,570          |

\*Variant impact as defined by [http://snpeff.sourceforge.net/SnpEff\\_manual.html#eff](http://snpeff.sourceforge.net/SnpEff_manual.html#eff). \*\*Feline reference genome sequence (V6.2) is included in the analyses. GWAS haplotype indicates the variants within the haplotype that was identified via the GWAS. Effect counts are higher than variant counts because a given variant can potentially affect both the flanking upstream and downstream genes. The full genome sequence of this Devon Rex cat is under submission to the NCBI SRA database (<http://www.ncbi.nlm.nih.gov/sra>) and the variant has been submitted to dbSNP.
