# Supplementary material
Source: PubMed Central journal article supplement (PMC5014195)
Supplement: AGE-46-711-s003.pdf [file AGE-46-711-s003.pdf]

**Table S3.** PCR primers used for genotyping *COLQ* variant in cats.

| <b>Assay</b>         | <b>5' Primer (5' – 3')</b> | <b>3' Primer (5' – 3')</b>  |
|----------------------|----------------------------|-----------------------------|
| <b>ASP (VGL) *</b>   | agtcagcattggcctgaatg       | atgacgtgggtgacagttg         |
|                      |                            | gatgacgtgggtgacagata        |
| <b>MU sequencing</b> | tgatatgctgggcagtaaaaagt    | cctagtaactgtcctgtgtttctgtgg |

\*ASP indicates allele specific PCR (reverse primers specific for wild-type or variant allele). The 5' primer is generally labelled with a fluorescent dye.
