# Supplementary material
Source: PubMed Central journal article supplement (PMC5014195)

**Figure S1.** Haplotype comparison between cases and controls in the region of association. Presented on top is the homozygous haplotype in the 7 cases and below the 19 controls Devon Rex, from position 128,192,494 to 131,992,072 on chromosome C2.

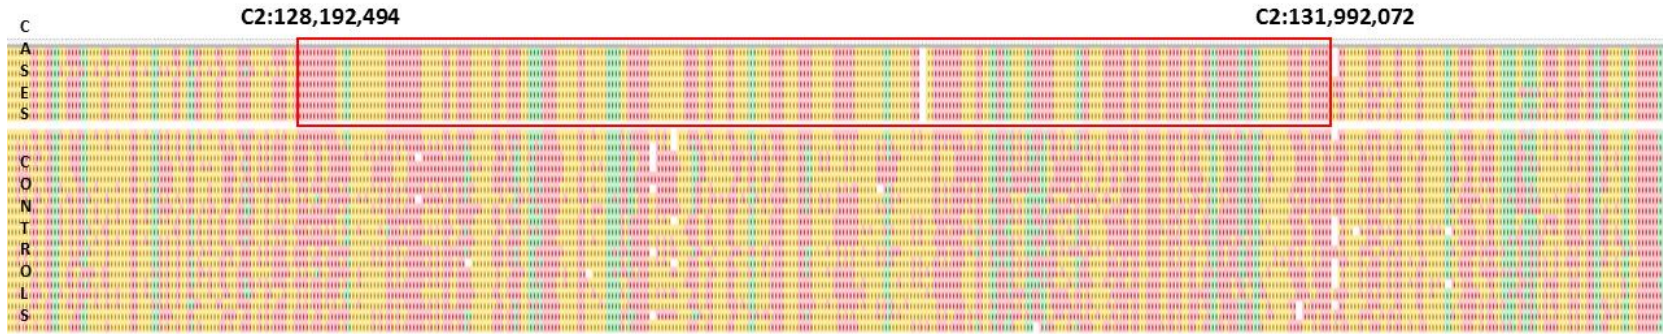

Supplement: AGE-46-711-s004.pdf [file AGE-46-711-s004.pdf]
