# Supplementary material
Source: PubMed Central journal article supplement (PMC5014195)
Supplement: AGE-46-711-s005.pdf [file AGE-46-711-s005.pdf]

**Figure S2** *COLQ* CDS and protein sequence. Presented are the feline wild-type and mutated CDS and amino acid *COLQ* sequences. Boldface indicates the base substitution in the CDS (c.1190G>A) and the associated amino acid substitution (p.397C>Y).

CDS wild-type

ATGGTTGTCCTGAATCCAGTGACTTTGGGAATCTATCTGCAGCTTTTCTTCCGCTTTATC

CDS mutated -----

Prot wild-type M V V L N P V T L G I Y L Q L F F R F I

Prot mutated - - - - -

CDS wild-type

GTGTCTCAGCCTACTTTCGTCAACAGCGTCTCCAATTCAGCAGCTTCCCCGGCCTG

CDS mutated -----

Prot wild-type V S Q P T F V N S V L P I S A A L P G L

Prot mutated - - - - -

CDS wild-type

GATCAGAAGAAGCGTGGCAGCCACAGAGCATGCTGCCTCCTGACGCCCCCTCCACCCCCG

CDS mutated -----

Prot wild-type D Q K K R G S H R A C C L L T P P P P P

Prot mutated - - - - -

CDS wild-type

CTGTTCCCACCACCATTCTTCAGAGGAGGCCGAAGCCTGCTTCTCTCCCCAGACATGAAG

CDS mutated -----

Prot wild-type L F P P P F F R G G R S L L L S P D M K

Prot mutated - - - - -

CDS wild-type

AATTCATCCTGGAAGTGGAGACCTCACAGTCCTCATGTGTGCAAGGATCACTCGGCTCC

CDS mutated -----

Prot wild-type N F I L E L E T S Q S S C V Q G S L G S

Prot mutated - - - - -

CDS wild-type

CCTGGGCCCCCTGGCCCCCAGGGTCCACCGGGACTTCCTGGCAAGATAGGACCAAAGGGA

CDS mutated -----

Prot wild-type P G P P G P Q G P P G L P G K I G P K G

Prot mutated - - - - -

CDS wild-type

GAAAAGGGGGAGCTTGGCCTACCAGGAAGAAAGGGTAGACCTGGCCCCCGGGTGTTCCT

CDS mutated -----

Prot wild-type E K G E L G L P G R K G R P G P P G V P

Prot mutated - - - - -

CDS wild-type  
GGCATGCCTGGGCCAGTCGGCCCTGAAGGACCCAGGGGTGAAAAAGGTGACCTGGGTGTG  
CDS mutated -----  
Prot wild-type G M P G P V G P E G P R G E K G D L G V  
Prot mutated - - - - -

CDS wild-type  
ATGGGCTTGCCAGGGTCAAGAGGACCAATGGGCTTCAAGGGCTACCCTGGATCCAGAGGG  
CDS mutated -----  
Prot wild-type M G L P G S R G P M G F K G Y P G S R G  
Prot mutated - - - - -

CDS wild-type  
GAAAAGGGATCCAGAGGTGAAAGGGGTGACTTGGGTCCCAAAGGAGAAAAGGGTTTCCCG  
CDS mutated -----  
Prot wild-type E K G S R G E R G D L G P K G E K G F P  
Prot mutated - - - - -

CDS wild-type  
GGATTTCTGGAATGTTGGGGCAGAAAGGTGAAATGGGTCCAAAGGGTGAGCCTGGGATA  
CDS mutated -----  
Prot wild-type G F P G M L G Q K G E M G P K G E P G I  
Prot mutated - - - - -

CDS wild-type  
GCAGGACACAGGGGACCCAGAGGAAGACCAGGAAAACGAGGCAAGCAGGGGCAGAAGGG  
A  
CDS mutated -----  
Prot wild-type A G H R G P R G R P G K R G K Q G Q K G  
Prot mutated - - - - -

CDS wild-type  
GATAGTGGAGTAATGGGCCACCAGGCAAGCCTGGGCCTTCTGGTCAACCTGGCCGTCCA  
CDS mutated -----  
Prot wild-type D S G V M G P P G K P G P S G Q P G R P  
Prot mutated - - - - -

CDS wild-type  
GGTCCCCCAGGCCCCCGGGCCCCCGATCCGCAGGACAACCTTGTGATGGGACCCAAAGGG  
CDS mutated -----  
Prot wild-type G P P G P P G P R S A G Q L V M G P K G  
Prot mutated - - - - -

CDS wild-type  
GACAGAGGATTTCCCGGGCCTCCAGGAAGTTGTCTTTGTGGAACCCCTACGAATGTGAAT  
CDS mutated -----  
Prot wild-type D R G F P G P P G S C L C G T P T N V N  
Prot mutated - - - - -

CDS wild-type  
AACCCTTCCTACAGGGAATCCATGTATGGGTCCAGCTCCCCTCATGTTCTGTGATTTTT  
CDS mutated -----  
Prot wild-type N P S Y R E S M Y G S S S P H V P V I F  
Prot mutated - - - - -

CDS wild-type  
GTGGTCAACAACCAGGAGGAGCTCGAGAGGCTGAACACCCAAAACGCCATTGCCTTCCGC  
CDS mutated -----  
Prot wild-type V V N N Q E E L E R L N T Q N A I A F R  
Prot mutated - - - - -

CDS wild-type  
AAAGATCAGAGATCTCTGTACTTCAAGGACAGCCTTGGCTGGCTCCCCATCCAGGTGACC  
CDS mutated -----  
Prot wild-type K D Q R S L Y F K D S L G W L P I Q V T  
Prot mutated - - - - -

CDS wild-type  
CCTTCCACCCTCTGGACTATACTGTGGACCACCGTGGCTCCTGCGGGGATGGAGTCCTG  
CDS mutated -----  
Prot wild-type P F H P L D Y T V D H R G S C G D G V L  
Prot mutated - - - - -

CDS wild-type  
CAGCCCGGGGAGGAGTGTGATGACGGAATGATGACGTGGGTGACAGCTGCATCAGCTGT  
CDS mutated -----A-----  
Prot wild-type Q P G E E C D D G N D D V G D S C I S C  
Prot mutated - - - - - Y - - -

CDS wild-type  
CACCGGGCCTACTGTGGAGATGGTCACCAGCACAAGGGAGTGGAGGACTGCGACGGCTCT  
CDS mutated -----  
Prot wild-type H R A Y C G D G H Q H K G V E D C D G S  
Prot mutated - - - - -

CDS wild-type  
GACTTTGGCCACCTGACCTGCGAGACCTATCTCCCTGGGTTCATATGGGGACCTGCAGTGC  
CDS mutated -----  
Prot wild-type D F G H L T C E T Y L P G S Y G D L Q C  
Prot mutated - - - - -

CDS wild-type ACCCCCTACTGCTACATCGACTCCACGTCCTGCCGCTACTTCACGTGA  
CDS mutated -----  
Prot wild-type T P Y C Y I D S T S C R Y F T X  
Prot mutated - - - - -
