# Supplementary material
Source: PubMed Central journal article supplement (PMC5014195)
Supplement: AGE-46-711-s006.pdf [file AGE-46-711-s006.pdf]

**Figure S3.** Decremental response to repetitive nerve stimulation at 3 Hz in an affected Sphynx cat. Sequential extensor digitorum brevis lateralis m. CMAP following peroneal n. stimulation at the hock: a) before edrophonium administration, b) after edrophonium administration.

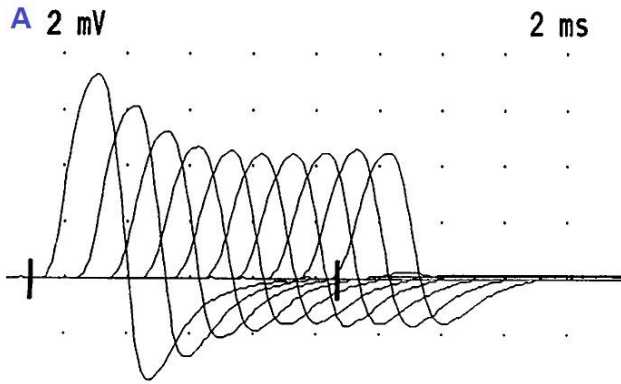

FOOT SWITCH: READY / STIMULATE / STOP  
 STIM.MODE: TRAIN / SINGLE

|            |          |               |        |
|------------|----------|---------------|--------|
| STIM FREQ: | 3 Hz     | NO. IN TRAIN: | 10     |
| STIM DUR:  | 0.2 ms   | STIM RJCT:    | 0.5 ms |
| TIME:      | 11:07:40 | STOP WATCH:   | 0:09   |
| COMMENT:   |          |               |        |

| POT NO. | P-P AMP mV | AMP. DECR % | AREA mVms | AREA DECR % | STIM. LEVEL |
|---------|------------|-------------|-----------|-------------|-------------|
| 1       | 10.96      | 0           | 18.80     | 0           | 1.6mA       |
| 2       | 9.05       | 17          | 15.60     | 17          | 1.6mA       |
| 3       | 7.46       | 32          | 12.90     | 31          | 1.6mA       |
| 4       | 6.66       | 39          | 11.50     | 39          | 1.6mA       |
| 5       | 6.26       | 43          | 10.90     | 42          | 1.6mA       |
| 6       | 6.14       | 44          | 10.60     | 44          | 1.6mA       |
| 7       | 6.20       | 43          | 10.60     | 44          | 1.6mA       |
| 8       | 6.18       | 44          | 10.70     | 43          | 1.6mA       |
| 9       | 6.39       | 42          | 10.90     | 42          | 1.6mA       |
| 10      | 6.15       | 44          | 10.70     | 43          | 1.6mA       |

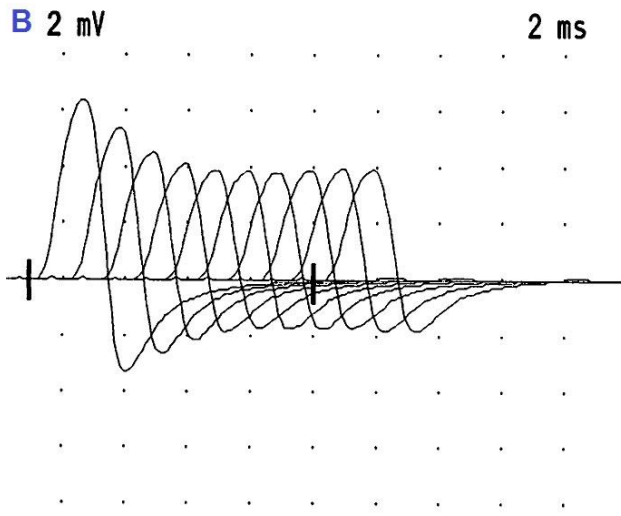

FOOT SWITCH: READY / STIMULATE / STOP  
 STIM.MODE: TRAIN / SINGLE

|            |          |               |        |
|------------|----------|---------------|--------|
| STIM FREQ: | 3 Hz     | NO. IN TRAIN: | 10     |
| STIM DUR:  | 0.2 ms   | STIM RJCT:    | 0.5 ms |
| TIME:      | 11:58:09 | STOP WATCH:   | 0:27   |
| COMMENT:   |          |               |        |

| POT NO. | P-P AMP mV | AMP. DECR % | AREA mVms | AREA DECR % | STIM. LEVEL |
|---------|------------|-------------|-----------|-------------|-------------|
| 1       | 9.77       | 0           | 14.80     | 0           | 1.5mA       |
| 2       | 8.07       | 17          | 12.10     | 18          | 1.5mA       |
| 3       | 6.79       | 31          | 10.10     | 32          | 1.5mA       |
| 4       | 6.03       | 38          | 9.11      | 38          | 1.5mA       |
| 5       | 5.68       | 42          | 8.61      | 42          | 1.5mA       |
| 6       | 5.67       | 42          | 8.65      | 42          | 1.5mA       |
| 7       | 5.65       | 42          | 8.53      | 42          | 1.5mA       |
| 8       | 5.69       | 42          | 8.60      | 42          | 1.5mA       |
| 9       | 5.81       | 41          | 8.80      | 41          | 1.5mA       |
| 10      | 5.78       | 41          | 8.86      | 40          | 1.5mA       |
